# Supplementary material for: Emission of Terpenoid Compounds from Rice Plants
Source: MDPI journal article supplement (doi:10.3390/environments10030049), 2023-03-08
Supplement: s1 [file s1]

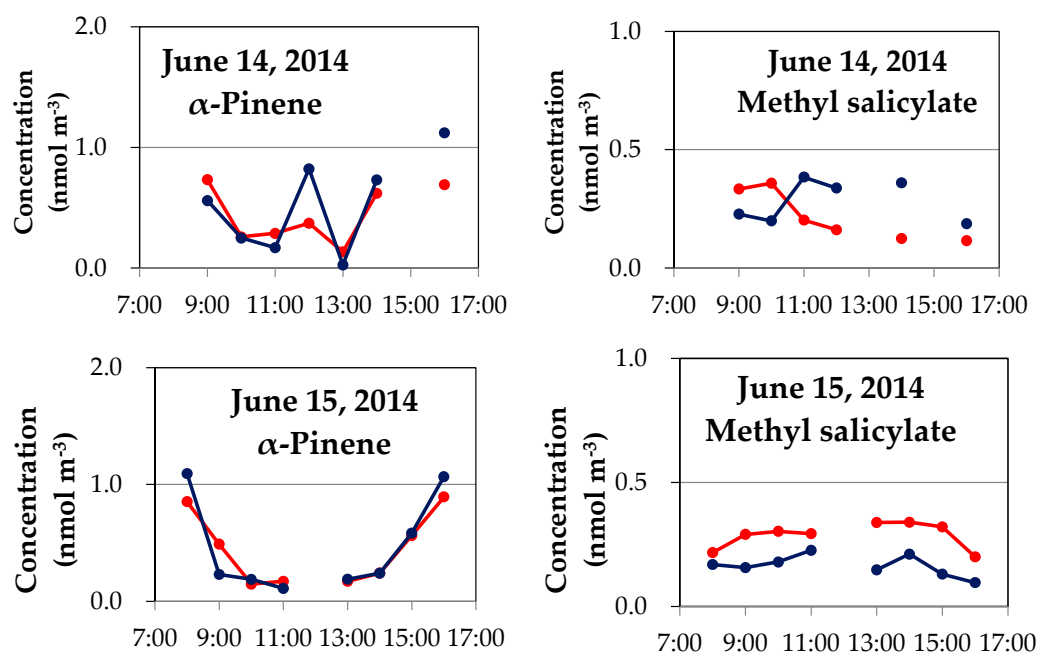

Figure S1 Concentrations of  $\alpha$ -pinene and methyl salicylate in upward (red) and downward (blue) airstreams measured in June 2014 (n = 15).

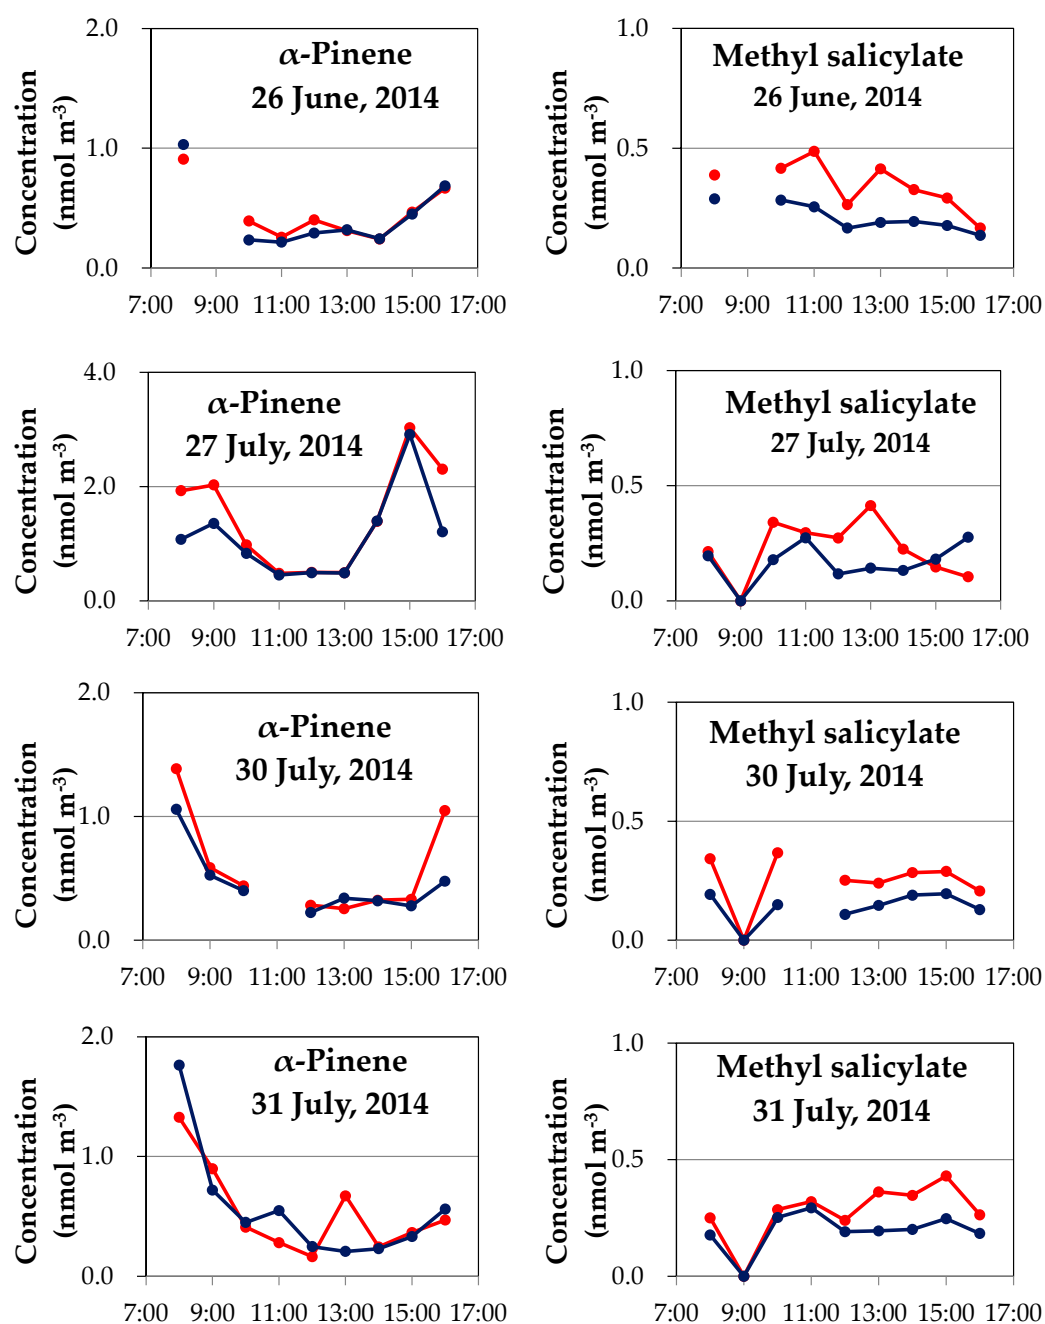

Figure S2 Concentrations of  $\alpha$ -pinene and methyl salicylate in upward (red) and downward (blue) airstreams measured in July 2014 (n = 34).

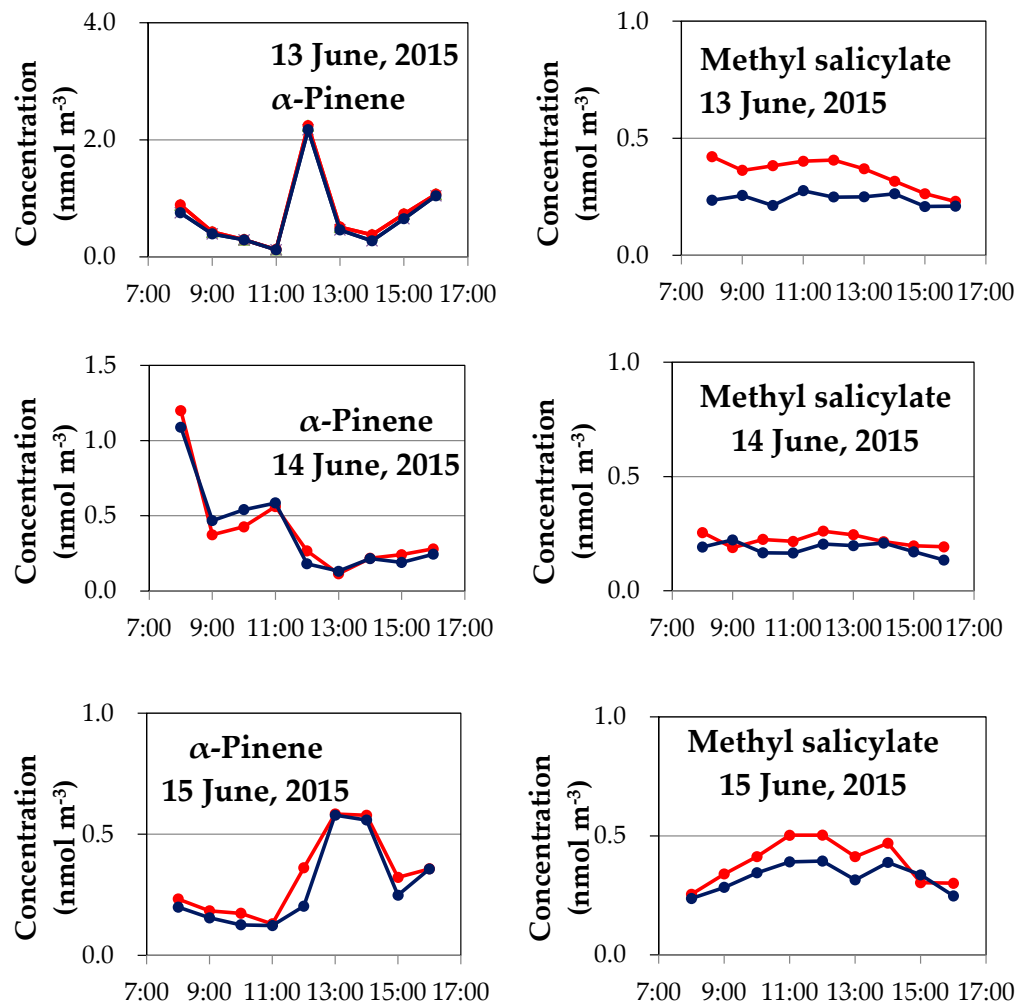

Figure S3 Concentrations of  $\alpha$ -pinene and methyl salicylate in upward (red) and downward (blue) airstreams measured in June 2015 (n = 27).

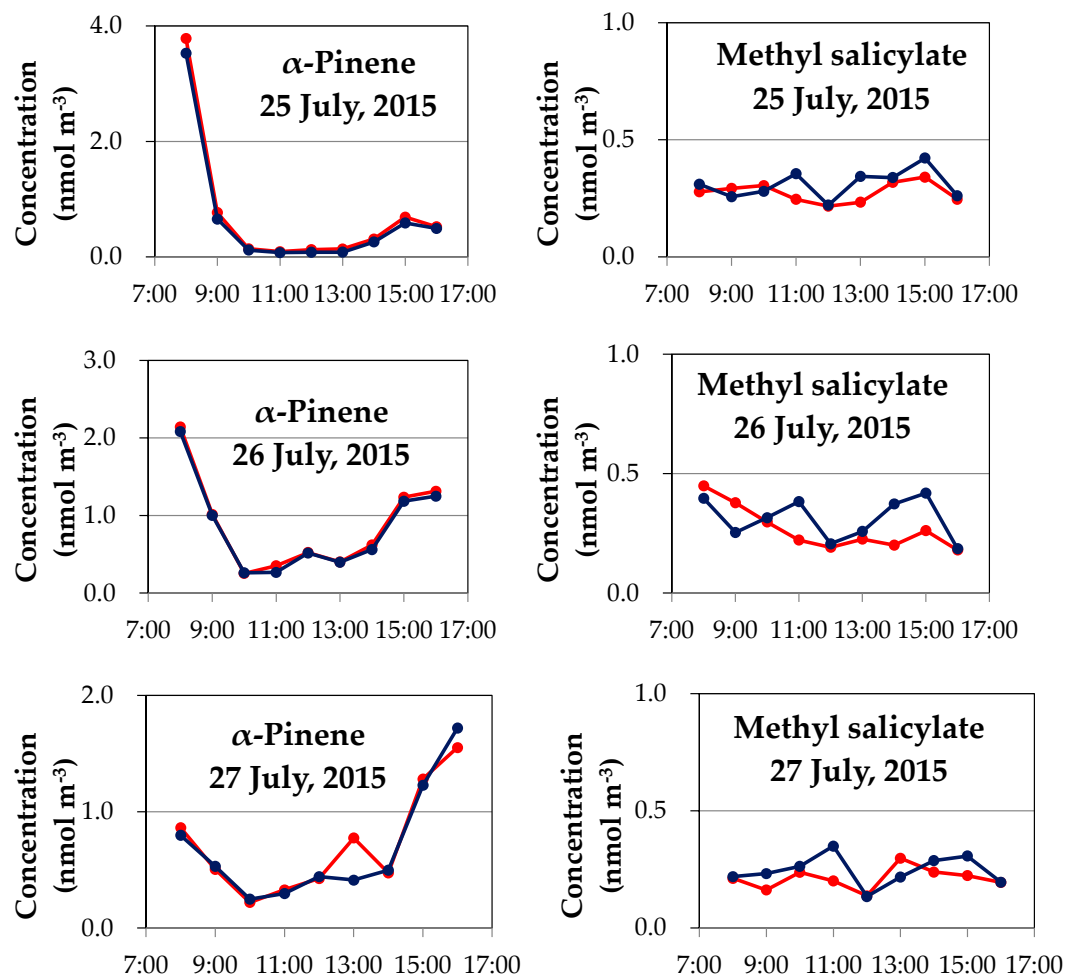

Figure S4 Concentrations of  $\alpha$ -pinene and methyl salicylate in upward (red) and downward (blue) airstreams measured in July 2015 (n = 27).
